# Supplementary material for: Audit of Data Sharing by Pharmaceutical Companies for Anticancer Medicines Approved by the US Food and Drug Administration
Source: PubMed Central journal article supplement (PMC9335250; doi:10.1001/jamaoncol.2022.2867), 2022-07-28
Supplement: jamaoncol-e222867-s001.pdf [file jamaoncol-e222867-s001.pdf]

## Supplemental Online Content

Modi ND, Abuhelwa AY, McKinnon RA, et al. Audit of data sharing by pharmaceutical companies for anticancer medicines approved by the US Food and Drug Administration. *JAMA Oncol*. Published online July 28, 2022.

doi:10.1001/jamaoncol.2022.2867

**eAppendix 1.** Standard Request Email

**eAppendix 2.** IPD Sharing Eligibility of Nonindustry-Sponsored Trials

**eTable 1.** Summary of Trials by Cancer Subtype

**eTable 2.** Breakdown of IPD Sharing Eligibility According to Key Descriptive Subgroups

This supplemental material has been provided by the authors to give readers additional information about their work.

## eAppendix 1. Standard Request Email

Title: Data Availability and Policy

Month, Date, 2021

To whom it may concern,

This is Natansh Modi, a PhD candidate in the Precision Medicine Group at Flinders University, Australia. Our group led by Dr Ash Hopkins is reviewing the availability and policy for sharing of oncology trials for independent scientific research.

I write to request clarification regarding the availability of individual participant data from clinical trials conducted by [COMPANY NAME]. I understand that individual participant data from eligible clinical trials may be shared with qualified researchers to facilitate further scientific research and honour the contribution of trial participants. Specifically, I request confirmation of whether the following clinical trials are eligible (in scope) for sharing of individual participant-level data with a valid research proposal.

- 1.
- 2.

If any of these studies are not currently in scope for sharing, I would appreciate details on when the trial(s) will become eligible for sharing individual participant data.

Thank you for your assistance with this query. The responses to this enquiry will be documented and compared to the transparency and policy of other companies. A major facet of honouring the contribution of trial participants is enabling independent research. Only through understanding eligibility for sharing across companies for these specific trials can our plans for future research be validly and timely designed.

Sincerely, Natansh Modi and Dr Ash Hopkins

## **eAppendix 2. IPD sharing eligibility of nonindustry-sponsored trials**

The results of 14 non-industry-sponsored trials were summarised in the product labels of the audited anticancer medicines which had been approved by the FDA in the 10-year sampling period. These trials were sponsored by 9 different non-industry sponsors. Of the 14 non-industry-sponsored trials, 2 trials were for cytotoxic medicines, 4 for immunomodulators, and 8 for targeted therapeutics not elsewhere specified. Of the 14 non-industry trials audited, 6 (43%) were in patients with solid tumours and 8 (57%) in haematological cancer. There were 7 (50%) phase 2 trials, 6 (43%) phase 3 trials, and for 1 (7%) trial the phase was not documented on [clinicaltrials.gov](https://clinicaltrials.gov). 10 (71%) trials had a trial start date before 1 Jan 2014, and 4 (29%) trials had a trial start date after 1 Jan 2014.

Of the 14 non-industry-sponsored trials audited, 7 (50%) trials were indicated as eligible for IPD sharing, and 7 (50%) were identified as not available for IPD sharing with independent researchers.

**eTable 1. Summary of Trials by Cancer Subtype**

| <b><u>Cancer subtype</u></b> | <b><u>Number of trials</u></b> |
|------------------------------|--------------------------------|
| Lung Cancer                  | 39                             |
| Leukemia                     | 28                             |
| Lymphoma                     | 27                             |
| Breast Cancer                | 26                             |
| Myeloma                      | 25                             |
| Melanoma                     | 21                             |
| Prostate Cancer              | 15                             |
| Bladder Cancer               | 9                              |
| Liver Cancer                 | 8                              |
| Colon and Rectal Cancer      | 8                              |
| Kidney Cancer                | 8                              |
| Ovarian Cancer               | 6                              |
| Oesophageal Cancer           | 4                              |
| Stomach Cancer               | 3                              |
| Thyroid Cancer               | 3                              |
| Other Solid Cancers          | 53                             |
| Other Haematological Cancers | 21                             |

**eTable 2. Breakdown of IPD Sharing Eligibility According to Key Descriptive Subgroups**

| Category                                                                                    |                 | Companies (n) | Trial eligible for IPD sharing |           | P-value* |
|---------------------------------------------------------------------------------------------|-----------------|---------------|--------------------------------|-----------|----------|
|                                                                                             |                 |               | Yes                            | No        |          |
| PhRMA/EFPIA membership                                                                      | Member          | 24            | 125 (48%)                      | 136 (52%) | <0.01    |
|                                                                                             | Non-Member      | 25            | 11 (26%)                       | 32 (74%)  |          |
| Cancer Type                                                                                 | Solid           | 35            | 89 (44%)                       | 114 (56%) | 0.66     |
|                                                                                             | Haematological  | 32            | 47 (47%)                       | 54 (53%)  |          |
| Trial Phase                                                                                 | Phase 1         | 12            | 2 (13%)                        | 14 (87%)  | <0.01    |
|                                                                                             | Phase 2         | 12            | 43 (38%)                       | 69 (62%)  |          |
|                                                                                             | Phase 3         | 34            | 91 (51%)                       | 85 (49%)  |          |
| Trial Design                                                                                | Nonrandomized   | 38            | 35 (33%)                       | 70 (67%)  | <0.01    |
|                                                                                             | Randomized      | 33            | 101 (51%)                      | 98 (49%)  |          |
| Company within the top 20 by global revenue                                                 | Top 20          | 18            | 119 (49%)                      | 126 (51%) | <0.01    |
|                                                                                             | Not Top 20      | 31            | 17 (29%)                       | 42 (71%)  |          |
| Top 10 anticancer medicine by global sales                                                  | Top 10          | 9             | 31 (35%)                       | 58 (65%)  | 0.02     |
|                                                                                             | Not Top 10      | 49            | 105 (49%)                      | 110 (51%) |          |
| Process of sharing                                                                          | External        | 19            | 113 (54%)                      | 98 (46%)  | <0.01    |
|                                                                                             | Internal        | 9             | 20 (32%)                       | 42 (68%)  |          |
|                                                                                             | None Identified | 21            | 3 (10%)                        | 28 (90%)  |          |
| Public data sharing policy                                                                  | Available       | 28            | 133 (49%)                      | 140 (51%) | <0.01    |
|                                                                                             | Not Available   | 21            | 3 (10%)                        | 28 (90%)  |          |
| Trial Start Date                                                                            | < 1 Jan 2014    | 30            | 88 (63%)                       | 52 (37%)  | <0.01    |
|                                                                                             | ≥ 1 Jan 2014    | 42            | 48 (29%)                       | 116 (71%) |          |
| Time since trial listed in product label                                                    | <3 years        | 44            | 40 (29%)                       | 96 (71%)  | <0.01    |
|                                                                                             | 3-7 years       | 22            | 65 (52%)                       | 61 (48%)  |          |
|                                                                                             | >7 years        | 17            | 31 (74%)                       | 11 (26%)  |          |
| IPD sharing policy includes a criterion about trial completion                              | No              | 15            | 62 (57%)                       | 46 (43%)  | <0.01    |
|                                                                                             | Yes             | 13            | 71 (43%)                       | 94 (57%)  |          |
|                                                                                             | Has no policy   | 21            | 3 (10%)                        | 28 (90%)  |          |
| Chi-sq evaluation of the distribution between trial eligible for IPD sharing "Yes" and "No" |                 |               |                                |           |          |
